# Supplementary material for: Acute Effects of Inorganic Nitrate Intake on Brachial and Femoral Flow-Mediated Vasodilation, and on Carotid Artery Reactivity Responses: Results of a Randomized, Double-Blinded, Placebo-Controlled Cross-Over Study in Abdominally Obese Men
Source: MDPI journal article supplement (doi:10.3390/nu14173560), 2022-08-29
Supplement: s1 [file s1]

## Supplementary Materials

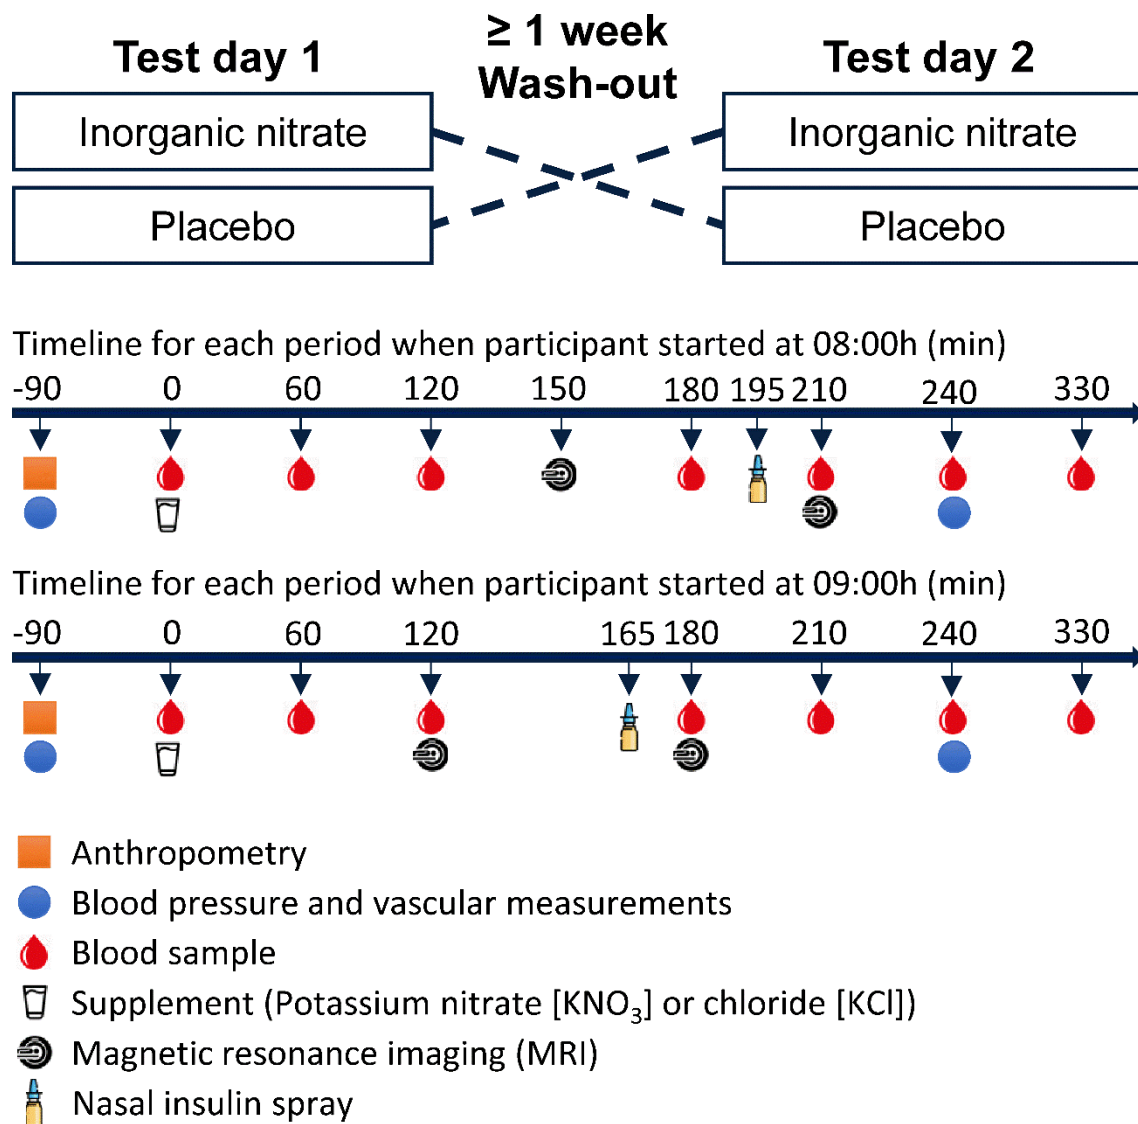

**Figure S1.** Schematic overview of study design [13].

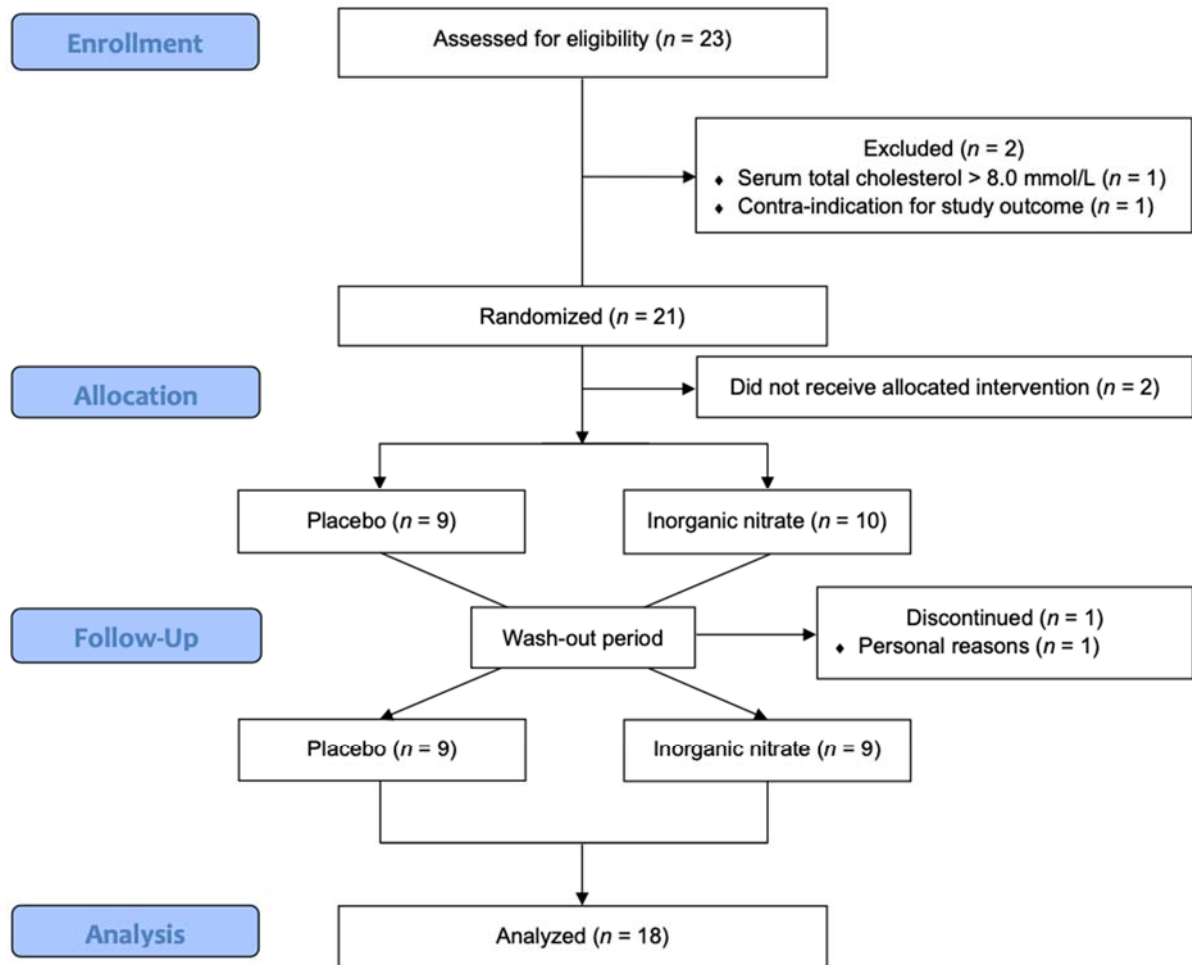

**Figure S2.** The CONSORT flow diagram of the volunteers screened, included and analyzed in this randomized trial.

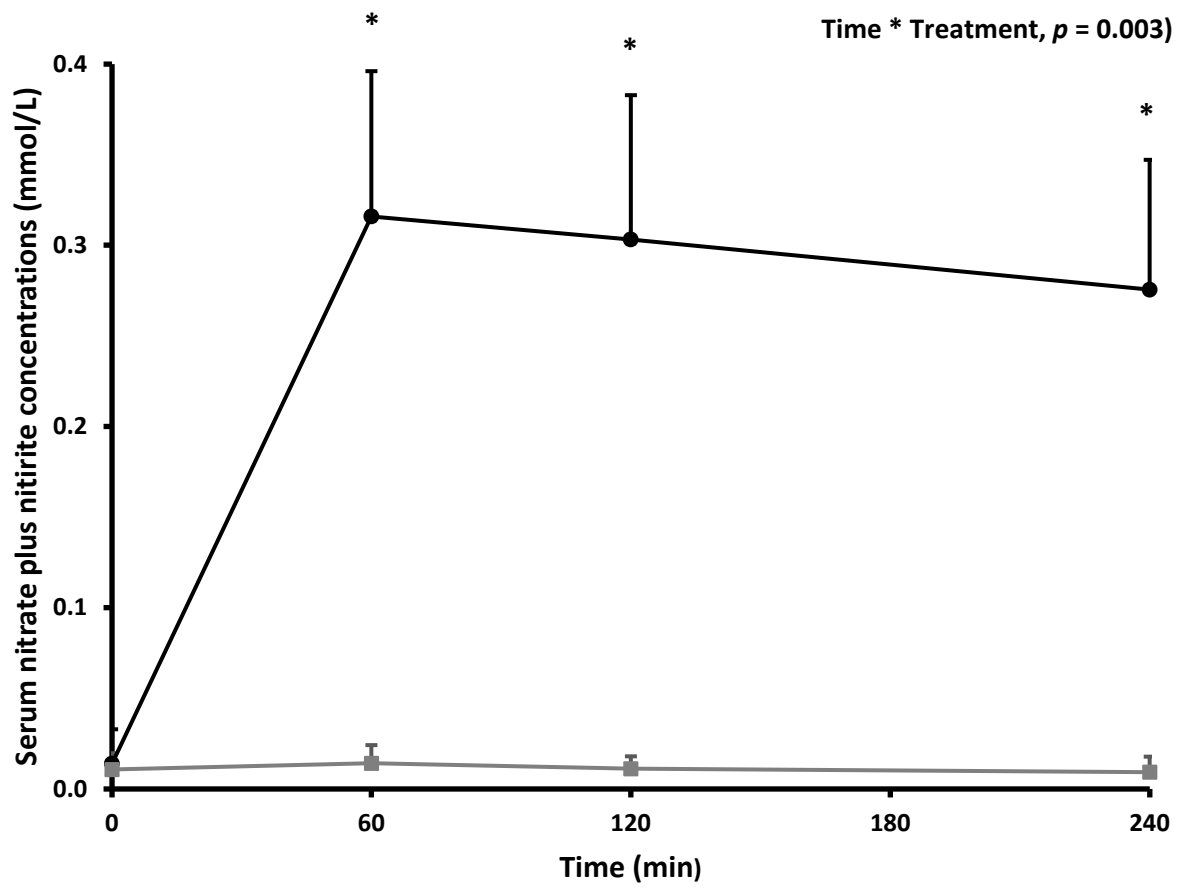

**Figure S3.** Mean serum nitrate concentrations ( $\pm$  SD) after the potassium nitrate (●) and placebo drink (■;  $n = 18$ ). \* Post-drink serum nitrate plus nitrite concentrations were higher at T60, T120 and T240 after consumption of the inorganic potassium nitrate drink ( $p < 0.001$ , for all time points) [13].

**Table S1.** Fasting total cholesterol, high-density lipoprotein cholesterol, low-density lipoprotein cholesterol, triacylglycerol, glucose and high-sensitivity C-reactive protein concentrations of the eighteen abdominally obese men who completed the study.

| Variables                     | Placebo         | Potassium nitrate |
|-------------------------------|-----------------|-------------------|
| Total cholesterol (mmol/L)    | 5.0 ± 0.9       | 4.9 ± 0.7         |
| HDL-cholesterol (mmol/L)      | 1.0 ± 0.2       | 1.1 ± 0.2         |
| LDL-cholesterol (mmol/L)      | 3.7 ± 0.8       | 3.5 ± 0.6         |
| TAG (mmol/L)                  | 1.3 ± 0.8       | 1.4 ± 0.6         |
| Insulin (IU)                  | 9.3 ± 6.6       | 7.3 ± 5.7         |
| Glucose (mmol/L)              | 5.8 ± 0.5       | 5.8 ± 0.6         |
| hsCRP (mg/L) <sup>1</sup>     | 1.3 (0.8 – 4.4) | 1.2 (0.8 – 3.6)   |
| Nitrate plus nitrite (mmol/L) | 0.01 ± 0.01     | 0.01 ± 0.02       |

Values are means ± SDs unless otherwise stated. HDL: high-density lipoprotein; hsCRP: high sensitivity C-reactive protein; LDL: low-density lipoprotein; TAG: triacylglycerol. <sup>1</sup> Values are median (interquartile range).

## References

- Kleinloog, J.P.D.; Mensink, R.P.; Smeets, E.T.H.C.; Ivanov, D.; Joris, P.J. Acute inorganic nitrate intake increases regional insulin action in the brain: Results of a double-blinded, randomized, controlled cross-over trial with abdominally obese men. *Neuroimage. Clin.* **2022**, *35*, 103115.
